# Supplementary material
Source: Research Square preprint supplement (doi:10.21203/rs.3.rs-9056248/v1)
Supplement: Supplementary file 1 [file 1dab3f64ef74f700da983099.pdf]

## KEY RESOURCES TABLE

| <b>REAGENT or RESOURCES</b>                    | <b>SOURCE</b>                        | <b>IDENTIFIER</b>                                                                                                 |
|------------------------------------------------|--------------------------------------|-------------------------------------------------------------------------------------------------------------------|
| <b>Biological samples</b>                      |                                      |                                                                                                                   |
| Human plasma                                   | Sun Yat-sen University Cancer Center | This paper                                                                                                        |
| Human tumor tissue                             | Sun Yat-sen University Cancer Center | This paper                                                                                                        |
| Human white blood cell                         | Sun Yat-sen University Cancer Center | This paper                                                                                                        |
| <b>Chemicals and reagents</b>                  |                                      |                                                                                                                   |
| Pamiparib                                      | BeiGene Ltd.                         | This paper                                                                                                        |
| Surufatinib                                    | Hutchison MediPharma Limited.        | This paper                                                                                                        |
| <b>Critical commercial assays</b>              |                                      |                                                                                                                   |
| DNeasy Blood and Tissue Kit                    | Qiagen                               | #69506                                                                                                            |
| QIAamp Circulating Nucleic Acid Kit            | Qiagen                               | #55114                                                                                                            |
| dsDNA HS Assay Kit                             | Life Technologies                    | #Q32854                                                                                                           |
| KAPA Hyper Prep Kit KAPA                       | Applied Biosystems                   | #KK8504/KK8529                                                                                                    |
| NimbleGen SeqCap EZ Hybridization and Wash Kit | Roche                                | #05340730001                                                                                                      |
| <b>Deposited data</b>                          |                                      |                                                                                                                   |
| The Genome Sequence Archive (GSA)              | This study                           | To be uploaded                                                                                                    |
| Data of patients                               | This study                           | <a href="https://www.researchdata.org.cn/">https://www.researchdata.org.cn/</a>                                   |
| <b>Softwares and algorithms</b>                |                                      |                                                                                                                   |
| Genome Analysis Toolkit                        | McKenna A et al.                     | <a href="https://github.com/broadinstitute/gatk/releases">https://github.com/broadinstitute/gatk/releases</a>     |
| VarScan2                                       | Koboldt et al.                       | <a href="http://dkoboldt.github.io/varscan/">http://dkoboldt.github.io/varscan/</a>                               |
| ANNOVAR(v 2015Mar22)                           | Wang et al.                          | <a href="https://annovar.openbioinformatics.org/en/latest/">https://annovar.openbioinformatics.org/en/latest/</a> |
| ADTE <sub>x</sub>                              | Kaushalya C<br>Amarasinghe et al.    | <a href="https://annovar.openbioinformatics.org/en/latest/">https://annovar.openbioinformatics.org/en/latest/</a> |
| BWA (v0.7.12)                                  | Li et al.                            | <a href="http://bio-bwa.sourceforge.net/">http://bio-bwa.sourceforge.net/</a>                                     |
| Picard (V.1.119)                               | Broad Institute                      | <a href="https://broadinstitute.github.io/picard/">https://broadinstitute.github.io/picard/</a>                   |
| R software (v4.3.2)                            | R project                            | <a href="https://www.r-project.org/">https://www.r-project.org/</a>                                               |
