# Supplementary material
Source: Research Square preprint supplement (doi:10.21203/rs.3.rs-9056248/v1)
Supplement: Supplementary file 2 [file e8502d360300a2ab0def8a7b.doc]

**Table S1. Baseline Patient Characteristics in Overall Population and Patients with Stable Disease**

| Characteristic, *n* (%) | Overall population (N = 29)  n (%) | Patients with stable disease (N = 20)  n (%) |
| --- | --- | --- |
| Age, years |  |  |
| Median (range) | 54 (31–69) | 52 (31–69) |
| FIGO stage at diagnosis |  |  |
| IC1 | 1 (3.4) | 1 (5.0) |
| IIB | 1 (3.4) | 1 (5.0) |
| IIIA1 | 1 (3.4) | 1 (5.0) |
| IIIC | 15 (51.7) | 8 (40.0) |
| IVB | 11 (37.9) | 9 (45.0) |
| Histologic subtype |  |  |
| High grade serous carcinoma | 27 (93.1) | 18 (90.0) |
| Clear cell | 1 (3.4) | 1 (5.0) |
| Carcinosarcoma | 1 (3.4) | 1 (5.0) |
| ECOG performance status |  |  |
| 0 | 3 (10.3) | 0 (0) |
| 1 | 26 (89.7) | 20 (100) |
| Number of prior lines of systemic therapies |  |  |
| Median | 3 | 3 |
| 1–2 | 10 (34.5) | 6 (30.0) |
| 3–4 | 19 (65.5) | 14 (70.0) |
| Treatment-free interval (TFI) | |  |
| Median (range) | 1.2 (0.6–5.8) | 1.4 (0.6–5.8) |
| < 3 months | 25 (86.2) | 17 (85.0) |
| ≥ 3 months and < 6 months | 4 (13.8) | 3 (15.0) |
| Platinum-free interval (PFI) | |  |
| Median (range) | 5.2 (0.9–38.0) | 4.6 (0.9–38.0) |
| < 3 months | 9 (31.0) | 7 (35.0) |
| ≥ 3 months and < 6 months | 8 (27.6) | 6 (30.0) |
| ≥ 6 months | 12 (41.4) | 7 (35.0) |
| Prior bevacizumab |  |  |
| Yes | 18 (62.1) | 10 (50.0) |
| No | 11 (37.9) | 10 (50.0) |
| Prior PARP inhibitor therapy |  |  |
| Olaparib a | 14 (48.3) | 10 (50.0) |
| Niraparib a | 15 (51.7) | 11 (55.0) |
| Fluzoparib | 1 (3.4) | 1 (5.0) |
| IMP4297 | 1 (3.4) | 0 (0) |
| Duration of prior PARP inhibitor treatment |  |  |
| Median (range) | 5.1 (1.6–37.7) | 5.0 (1.6–37.7) |
| < 6 months | 17 (58.6) | 12 (60.0) |
| ≥ 6 months and < 12 months | 5 (17.2) | 3 (15.0) |
| ≥ 12 months | 7 (24.1) | 5 (25.0) |

a Two patients received treatment with both olaparib and niraparib.

FIGO, The International Federation of Gynecology and Obstetrics; ECOG, Eastern Cooperative Oncology Group.
